# Supplementary material
Source: PubMed Central journal article supplement (PMC4955713)
Supplement: NIHMS783181-supplement-01.pdf [file NIHMS783181-supplement-01.pdf]

### Supplemental materials

Table S1.

*Means, standard deviations, and intercorrelations among RTs across conditions in the Affective Posner and Dot-Probe tasks.*

|   | Variable        | Mean   | SD    | 1    | 2    | 3    | 4    | 5    |
|---|-----------------|--------|-------|------|------|------|------|------|
| 1 | Angry Valid     | 448.34 | 70.54 | -    |      |      |      |      |
| 2 | Angry Invalid   | 455.04 | 66.31 | .868 | -    |      |      |      |
| 3 | Neutral Valid   | 443.93 | 65.45 | .932 | .878 | -    |      |      |
| 4 | Neutral Invalid | 453.45 | 68.56 | .879 | .934 | .861 | -    |      |
| 5 | Congruent       | 590.74 | 75.87 | .503 | .447 | .454 | .433 | -    |
| 6 | Incongruent     | 591.23 | 76.26 | .517 | .472 | .467 | .467 | .978 |

*Note:* Means are in milliseconds; 1-4 indicate Affective Posner variables and 5-6 indicate Dot-Probe variables. All correlations are significant ( $p < .01$ ).
